# Supplementary material for: Modalites therapeutiques et facteurs pronostiques du traitement des hepatites chroniques c par l'interferon
Source: MDPI journal article supplement (doi:10.3390/metabo12111044), 1992-01-01
Supplement: s1 [file s1]

## Supplementary data

**Table S1** Key terms used in database searches.

| Variable of interest              | Key terms                                                                                                                                                                                                                                                                                                                                                                                                                                                                                                                |
|-----------------------------------|--------------------------------------------------------------------------------------------------------------------------------------------------------------------------------------------------------------------------------------------------------------------------------------------------------------------------------------------------------------------------------------------------------------------------------------------------------------------------------------------------------------------------|
| <b>microRNA</b>                   | ("Circulating MicroRNA" OR "Circulating MicroRNAs" OR "MicroRNA, Circulating" OR " circulating miRNAs" OR "Blood microRNA" OR "Cell-Free MicroRNA" OR "Cell Free MicroRNA" OR "MicroRNA, Cell-Free" OR "hsa-miR" OR "serum MicroRNA" OR "plasma MicroRNA")                                                                                                                                                                                                                                                               |
| <b>Lipid control variables</b>    | ("Cholesterol, HDL" OR "HDL Cholesterol" OR "Cholesterol, LDL" OR "LDL Cholesterol" OR "lipoprotein cholesterol" OR "Cholesterol, VLDL" OR "VLDL Cholesterol" OR "lipid profile" OR triglycerides OR Triacylglycerol OR Triacylglycerols)                                                                                                                                                                                                                                                                                |
| <b>Glycemic control variables</b> | ("blood glucose" OR glycemia OR fructosamine OR HbA1c OR "hemoglobin A1c" OR "Glycated Hemoglobin A" OR "glycosylated hemoglobin" OR insulin OR "homeostasis model assessment" OR HOMA)                                                                                                                                                                                                                                                                                                                                  |
| <b>Inflammatory variables</b>     | ("C-reactive protein" OR "C Reactive Protein" OR "Protein, C-Reactive" OR adiponectin OR Interleukin OR Interleukins OR "interleukin-6" OR "Interleukin 6 " OR "IL6" OR "IL-6" OR "interleukin-10" OR IL-10 OR "IL 10" OR "Leptin" OR "Cell Adhesion Molecule-1" OR "Vascular Cell Adhesion Molecule-1" OR "VCAM-1" OR "Vascular Cell Adhesion Molecule 1" OR "Intercellular Adhesion Molecule-1" OR "ICAM-1" OR fibrinogen OR "Tumor Necrosis Factor-alpha" OR "TNF-alpha" OR "TNF alpha" OR "Serum Amyloid A Protein") |
| <b>Body composition variables</b> | ("body mass index" OR "BMI" OR "Body Weight" OR "Body Composition" OR Anthropometry OR "waist circumference" OR Adiposity OR obesity OR "blood pressure")                                                                                                                                                                                                                                                                                                                                                                |
