# Supplementary material for: Modalites therapeutiques et facteurs pronostiques du traitement des hepatites chroniques c par l'interferon
Source: MDPI journal article supplement (doi:10.3390/metabo12111044), 1992-01-01
Supplement: s1 [file s1]

**Table S2.** Papers excluded after full reading and reasons for exclusion.

| Author and year of study   | Title                                                                                                                                                                                                                                          | Reasons for papers exclusion                                                                                                         |
|----------------------------|------------------------------------------------------------------------------------------------------------------------------------------------------------------------------------------------------------------------------------------------|--------------------------------------------------------------------------------------------------------------------------------------|
| Noren-Hooten et al. 2013   | Age-related changes in microRNA levels in serum                                                                                                                                                                                                | Article did not assess correlations between microRNA and variables of glucose and lipid metabolism or blood pressure or inflammation |
| Olivieri et al. 2012       | Age-related differences in the expression of circulating microRNAs: miR-21 as a new circulating marker of inflammaging                                                                                                                         | Article did not assess correlations between microRNA and variables of glucose and lipid metabolism or blood pressure or inflammation |
| Braga 2018                 | Análise de miRNoma em sangue periférico de indivíduos com obesidade e resistência à insulina TT                                                                                                                                                | Thesis                                                                                                                               |
| Ashoori et al. 2018        | Apelin-13 serum levels in type 2 diabetic obese women: Possible relations with microRNAs-107 and 375                                                                                                                                           | Article did not assess correlations between microRNA and variables of glucose and lipid metabolism or blood pressure or inflammation |
| Jiménez-Lucena et al. 2018 | A plasma circulating miRNAs profile predicts type 2 diabetes mellitus and prediabetes: from the CORDIOPREV study                                                                                                                               | Individuals had established coronary health disease                                                                                  |
| Knoka et al. 2019          | Association between circulating microRNAs and metabolic biomarkers in patients with prediabetes with or without early atherosclerosis                                                                                                          | Work presented in conference as abstract and sample composed by individuals with coronary artery disease                             |
| Munetsuna et al. 2018      | Association of subcutaneous and visceral fat with circulating microRNAs in a middle-aged Japanese population                                                                                                                                   | The article have not control group                                                                                                   |
| Ameling et al. 2015        | Associations of circulating plasma microRNAs with age, body mass index and sex in a population-based study                                                                                                                                     | The article have not control group                                                                                                   |
| Alramah et al. 2019        | Associations of targeted circulating microRNAs with insulin resistance in the camera (carotid atherosclerosis: Metformin for insulin resistance) trial                                                                                         | Work presented in conference as abstract and sample composed by individuals with coronary artery disease                             |
| Spinetti et al. 2016       | Blood circulating microRNA-15a and microRNA-16 in diabetic patients: Preliminary results of the DIAPASON study                                                                                                                                 | Work presented in conference as abstract                                                                                             |
| Raitoharju et al. 2016     | Blood hsa-miR-122-5p and hsa-miR-885-5p levels associate with fatty liver and related lipoprotein metabolism-The Young Finns Study                                                                                                             | Follow-up study and microRNA assessed in whole blood                                                                                 |
| Raitoharju et al. 2014     | Blood microRNA profile associates with the levels of serum lipids and metabolites associated with glucose metabolism and insulin resistance and pinpoints pathways underlying metabolic syndrome: the cardiovascular risk in Young Finns Study | microRNA assessed in whole blood                                                                                                     |
| Fejes et al. 2015          | Changes in the expression of plasma and platelet microRNAs in type 2 diabetes mellitus and obesity                                                                                                                                             | Work presented in conference as abstract                                                                                             |
| Willeit                    | Circulating microRNA-122 is associated with incident metabolic syndrome and type-2-diabetes                                                                                                                                                    | Work presented in conference as abstract                                                                                             |

| et al. 2015                        |                                                                                                                          |                                                                                                                                      |
|------------------------------------|--------------------------------------------------------------------------------------------------------------------------|--------------------------------------------------------------------------------------------------------------------------------------|
| Willeit et al. 2017                | Circulating MicroRNA-122 Is Associated With the Risk of New-Onset Metabolic Syndrome and Type 2 Diabetes                 | Cohort study and sample had individuals with cardiovascular disease                                                                  |
| Wen; Qiao; Wang 2015               | Circulating microRNA-223 as a potential biomarker for obesity                                                            | Case-control study in which individuals received lifestyle intervention                                                              |
| (continues)<br>(continuation)      |                                                                                                                          |                                                                                                                                      |
| Author and year of study           | Title                                                                                                                    | Reasons for papers exclusion                                                                                                         |
| Sodi et al. 2015                   | Circulating microRNA-30c is associated with total-and LDL-cholesterol                                                    | Work presented in conference as abstract                                                                                             |
| Norizam et al. 2014                | Circulating microRNA as biomarkers for young dyslipidemia men                                                            | Work presented in conference as abstract                                                                                             |
| Bajomo et al. 2013                 | Circulating MicroRNA in the assessment of obesity                                                                        | Work presented in conference as abstract                                                                                             |
| Karolina; Armugam; Jeyaseelan 2011 | Circulating micrnas: Potential biomarkers in artherosclerosis                                                            | Work presented in conference as abstract                                                                                             |
| Jaeger et al. 2018                 | Circulating microRNAs-192 and-194 are associated with the presence and incidence of diabetes mellitus                    | Clinical discovery and validation studies                                                                                            |
| Flowers et al. 2019                | Circulating microRNAs are associated with glycemic variability over a 12-month period                                    | Paper not retrieved                                                                                                                  |
| Iacomino et al. 2016               | Circulating microRNAs are deregulated in overweight/obese children: Preliminary results of the I. Family study           | Article did not assess correlations between microRNA and variables of glucose and lipid metabolism or blood pressure or inflammation |
| Khalyfa et al. 2016                | Circulating microRNAs as Potential Biomarkers of Endothelial Dysfunction in Obese Children                               | Individuals had endothelial dysfunction                                                                                              |
| Ma et al. 2015                     | Circulating microRNA species and role in human insulin resistance                                                        | Work presented in conference as abstract                                                                                             |
| Zhang; Shang; Wang 2015            | Circulating miR-126 is a potential biomarker to predict the onset of type 2 diabetes mellitus in susceptible individuals | Follow-up study                                                                                                                      |
| Yildirim et al. 2019               | Circulating miR-21 levels in hypertensive patients with asymptomatic organ damage                                        | Individuals had asymptomatic organ damage                                                                                            |
| Miao et al. 2019                   | Circulating miR-3659 may be a potential biomarker of dyslipidemia in patients with obesity                               | Article used integrated bioinformatic methods                                                                                        |

| Karolina et al. 2012          | Circulating miRNA profiles in patients with metabolic syndrome                                                                                                  | MicroRNA quantified in blood and exosomes                                                                                            |
|-------------------------------|-----------------------------------------------------------------------------------------------------------------------------------------------------------------|--------------------------------------------------------------------------------------------------------------------------------------|
| Iacomino et al. 2015          | Circulating miRNAs are deregulated in overweight/obese children: Preliminary results of the I. family study                                                     | Work presented in conference as abstract                                                                                             |
| Niemina et al. 2018           | Circulating miRNAs as predictive biomarkers for type 2 diabetes development in individuals at risk: Outcomes of a 5-year prospective observational cohort study | Work presented in conference as abstract                                                                                             |
| Camargo et al. 2018           | Circulating miRNAs as predictive biomarkers of type 2 diabetes mellitus development: From the CORDIOPREV study                                                  | Work presented in conference as abstract                                                                                             |
| (continues)<br>(continuation) |                                                                                                                                                                 |                                                                                                                                      |
| Author and year of study      | Title                                                                                                                                                           | Reasons for papers exclusion                                                                                                         |
| Khalyfa et al. 2015           | Circulating mirnas-potential biomarkers of endothelial dysfunction in children                                                                                  | Work presented in conference as abstract                                                                                             |
| Chen et al. 2019              | Correlation between serum microRNA-122 and insulin resistance in obese children                                                                                 | Paper written in Chinese                                                                                                             |
| Wang et al. 2014              | Determination of 14 circulating microRNAs in Swedes and Iraqis with and without diabetes mellitus type 2                                                        | The article have not control group                                                                                                   |
| Guo et al. 2019               | Diagnostic Value of Serum MiR-587 in Patients with Metabolic Syndrome                                                                                           | Paper not retrieved                                                                                                                  |
| Yan et al. 2016               | Differential expression of microRNAs in plasma of patients with prediabetes and newly diagnosed type 2 diabetes                                                 | Article did not assess correlations between microRNA and variables of glucose and lipid metabolism or blood pressure or inflammation |
| Zandoná et al. 2016           | Differential plasma concentrations of MicroRNA-16-5p and MicroRNA-19b in Brazilian lean and obese children                                                      | Work presented in conference as abstract                                                                                             |
| Lin et al. 2015               | Elevated circulating microRNA-143-3p is associated with insulin resistance in the metabolic syndrome                                                            | Work presented in conference as abstract                                                                                             |
| Thompson et al. 2017          | Elevation of circulating microRNA levels in obese children compared to healthy controls                                                                         | Individuals had non-alcoholic fatty liver disease                                                                                    |
| Azmir et al. 2014             | Identification of circulating microRNAs in young men with central obesity                                                                                       | Work presented in conference as abstract                                                                                             |
| Ding et al. 2016              | Identification of the differential expression of serum microRNA in type 2 diabetes                                                                              | Article did not assess correlations between microRNA and variables of glucose and lipid metabolism or blood pressure or inflammation |
| Kilic et al. 2015             | microRNA-143 and-223 in obesity                                                                                                                                 | microRNA assessed in whole blood                                                                                                     |

| Dias et al. 2017              | MicroRNA expression profiling for the early detection of type 2 diabetes in South African women of mixed ethnic ancestry                              | Work presented in conference as abstract                                                                                                               |
|-------------------------------|-------------------------------------------------------------------------------------------------------------------------------------------------------|--------------------------------------------------------------------------------------------------------------------------------------------------------|
| Masotti et al. 2017           | Oral glucose tolerance test unravels circulating miRNAs associated with insulin resistance in obese preschoolers                                      | Age < 5 years old                                                                                                                                      |
| Gao et al. 2012               | Plasma levels of lipometabolism-related miR-122 and miR-370 are increased in patients with hyperlipidemia and associated with coronary artery disease | Individuals had coronary artery disease                                                                                                                |
| Trusinskis et al. 2017        | Plasma microRNA-155 predicts increased plaque vulnerability in patients with prediabetes                                                              | Work presented in conference as abstract                                                                                                               |
| Iacomino et al. 2019          | Plasma microRNA expression profiles are associated with early childhood obesity: Results of the I.Family Study                                        | Work presented in conference as abstract                                                                                                               |
| Zampetaki et al. 2010         | Plasma MicroRNA profiling reveals loss of endothelial MiR-126 and other MicroRNAs in type 2 diabetes                                                  | Validation study. Article did not assess correlations between microRNA and variables of glucose and lipid metabolism or blood pressure or inflammation |
| (continues)<br>(continuation) |                                                                                                                                                       |                                                                                                                                                        |
| Author and year of study      | Title                                                                                                                                                 | Reasons for papers exclusion                                                                                                                           |
| Zhao et al. 2017              | Plasma MicroRNA signature predicting weight gain among Mexican-American women                                                                         | Follow-up study                                                                                                                                        |
| Zhang et al. 2013             | Plasma miR-126 Is a Potential Biomarker for Early Prediction of Type 2 Diabetes Mellitus in Susceptible Individuals                                   | Article did not assess correlations between microRNA and variables of glucose and lipid metabolism or blood pressure or inflammation                   |
| Flowers et al. 2017           | Preliminary evidence supports circulating microRNAs as prognostic biomarkers for type 2 diabetes                                                      | The sample was composed of participants from clinical trials that studied behavioral risk reduction interventions                                      |
| Ma; Fu; Garvey 2018           | Relationship of Circulating miRNAs with Insulin Sensitivity and Associated Metabolic Risk Factors in Humans                                           | The article have not control group                                                                                                                     |
| Rezk; Sabbah; Saad 2016       | Role of microRNA 126 in screening, diagnosis, and prognosis of diabetic patients in Egypt                                                             | Individuals had diabetic macrovascular complications, nephropathy,retinopathy,and neuropathy                                                           |
| Pescador et al. 2013          | Serum Circulating microRNA Profiling for Identification of Potential Type 2 Diabetes and Obesity Biomarkers                                           | Article did not assess correlations between microRNA and variables of glucose and lipid metabolism or blood pressure or inflammation                   |
| Wang et al. 2013              | Serum Microrna 122 levels correlate positively with alanine aminotransferase levels and insulin resistance in Chinese young adults                    | Paper not retrieved                                                                                                                                    |

|                              |                                                                                                                              |                                                                                                                                                        |
|------------------------------|------------------------------------------------------------------------------------------------------------------------------|--------------------------------------------------------------------------------------------------------------------------------------------------------|
| Yang et al. 2017             | Serum microRNA profiling and bioinformatics analysis of patients with type 2 diabetes mellitus in a Chinese population       | Article did not assess correlations between microRNA and variables of glucose and lipid metabolism or blood pressure or inflammation                   |
| Yang et al. 2014             | Serum miR-23a, a potential biomarker for diagnosis of pre-diabetes and type 2 diabetes                                       | Validation study. Article did not assess correlations between microRNA and variables of glucose and lipid metabolism or blood pressure or inflammation |
| Xu et al. 2019               | Several circulating miRNAs related to hyperlipidemia and atherosclerotic cardiovascular diseases                             | Individuals had atherosclerotic cardiovascular diseases                                                                                                |
| Meerson et al. 2019          | Sex Differences in Plasma MicroRNA Biomarkers of Early and Complicated Diabetes Mellitus in Israeli Arab and Jewish Patients | Individuals had renal and vascular complications                                                                                                       |
| Kong et al. 2011             | Significance of serum microRNAs in pre-diabetes and newly diagnosed type 2 diabetes: A clinical study                        | Validation study. Article did not assess correlations between microRNA and variables of glucose and lipid metabolism or blood pressure or inflammation |
| Prats-Puig et al. 2013       | Study of circulating microRNAs in prepubertal obesity                                                                        | Work presented in conference as abstract                                                                                                               |
| Eastwood; Caslake; Sodi 2016 | The association of circulating microRNA-30c with atherogenic lipoprotein subfractions and composition                        | Study determined association with atherogenic lipoprotein subfractions                                                                                 |
| Chuan et al. 2015            | The changes in miR-130b levels in human serum and the correlation with the severity of diabetic nephropathy                  | Individuals had diabetic nephropathy                                                                                                                   |

(continues)

(continuation)

| Author and year of study       | Title                                                                                                                                                                                                                             | Reasons for papers exclusion                  |
|--------------------------------|-----------------------------------------------------------------------------------------------------------------------------------------------------------------------------------------------------------------------------------|-----------------------------------------------|
| Liang et al. 2014              | The circulating miRNAs expression in simple obese children                                                                                                                                                                        | Work presented in conference as abstract      |
| Zhang et al. 2018              | The diagnostic values of circulating miRNAs for hypertension and bioinformatics analysis                                                                                                                                          | Validation study with bioinformatics analysis |
| Corona-Meraz et al. 2019       | The increase of circulating miR-143 and miR-33B relative expression, and adiponectin multimeric forms dysregulation are associated with the body fat storage and immunometabolic profile in individuals with obesogenic phenotype | Work presented in conference as abstract      |
| Can; Buyukinan; Yerlikaya 2016 | The investigation of circulating microRNAs associated with lipid metabolism in childhood obesity                                                                                                                                  | microRNA assessed in whole blood              |
| Eastwood et al. 2016           | The relationship between circulating microRNA and lipid indices                                                                                                                                                                   | Work presented in conference as abstract      |

|                                    |                                                                                                                                                                                       |                                                                                                       |
|------------------------------------|---------------------------------------------------------------------------------------------------------------------------------------------------------------------------------------|-------------------------------------------------------------------------------------------------------|
| Liu et al. 2014                    | The role of circulating microRNA-126 (miR-126): A novel biomarker for screening prediabetes and newly diagnosed type 2 diabetes mellitus                                              | Individuals had diet and physical activity intervention                                               |
| Al-Muhtareh; Salem; Al-Kafaji 2019 | Upregulation of Circulating Cardiomyocyte-Enriched miR-1 and miR-133 Associate with the Risk of Coronary Artery Disease in Type 2 Diabetes Patients and Serve as Potential Biomarkers | microRNA assessed in whole blood                                                                      |
| Beeghly-Fadiel et al. 2013         | Variation in circulating miRNA across physiologic traits: Implications for biomarker studies                                                                                          | Work presented in conference as abstract                                                              |
| Mononen et al. 2019                | Whole blood microRNA levels associate with glycemic status and correlate with target mRNAs in pathways important to type 2 diabetes                                                   | microRNA assessed in whole blood                                                                      |
| Kimura et al. 2016                 | Clinical Significance of Determining Plasma MicroRNA33b in Type 2 Diabetic Patients with Dyslipidemia                                                                                 | Study did not have a healthy control group and individuals had nutritional advice to control diabetes |
| Doumatey et al. 2018               | Circulating MiR-374a-5p is a potential modulator of the inflammatory process in obesity                                                                                               | Study did not have a healthy control group                                                            |
