# Supplementary material for: Circulating microRNA Related to Cardiometabolic Risk Factors for Metabolic Syndrome: A Systematic Review
Source: Metabolites. 2022 Oct 30;12(11):1044. doi: 10.3390/metabo12111044 (PMC9692352; doi:10.3390/metabo12111044)
Supplement: Supplementary file 1 [file metabolites-12-01044-s001.zip]

Archive with 4 entries (4 files):
- PRISMA_checklist_edited.pdf
- Table S1_Search Strategy_Supplementary data.pdf
- Table S2_Papers excluded stage 2_Supplementary_edited.pdf
- Table S3_microRNA associations_Supplementary data.xlsx
