# Supplementary material for: Circulating microRNA Related to Cardiometabolic Risk Factors for Metabolic Syndrome: A Systematic Review
Source: Metabolites. 2022 Oct 30;12(11):1044. doi: 10.3390/metabo12111044 (PMC9692352; doi:10.3390/metabo12111044)
Supplement: Supplementary file 1 [file metabolites-12-01044-s001.zip › Table S3_microRNA associations_Supplementary data.xlsx]

## Sheet: microRNAs and risk factors
microRNA	Disease states	Expression	Association with cardiometabolic biomarkers															References
			Glucose	Insulin	HOMA-IR	HbA1c	Tryacilglycerol	Cholesterol	LDL-c	HDL-c	IMC	Waist circumference	Blood pressure	C-reative protein	Adiponectin	Leptin	IL-1β
1	T2D	Upregulated	ns	ne	ns	ns	ns	ns	ns	ns	ns	ne	ne	ne	ne	ne	ne	Sucharita et al., 2018 [17]
9	T2D	Downregulated	ns	ne	ns	ns	ns	ns	ns	ns	ns	ne	ne	ne	ne	ne	ne	Sucharita et al., 2018 [17]
10a	Dyslipidemia	Upregulated	ns	ne	ne	ne	+	+	+	ns	ne	ne	ne	+	ne	ne	+	Simionescu et al. 2014 [34]
10b	Obesity	Downregulated	ns	ns	ns	ns	ns	ns	ns	ns	-	ne	ne	ne	ne	ne	ne	Iacomino et al. 2019 [14]
15a	Obesity	Downregulated	-	-	-	ne	+	ne	+	+	-	ne	ne	ne	+	+	ne	Al-Rawaf, 2018 [13]
15b	Obesity	Upregulated	+	ne	ne	ne	ne	ne	ne	ne	+	ne	ne	ne	ne	ne	ne	Cui et al. 2018 [12]
16-1	Obesity	Upregulated	ne	ne	+	ne	+	ne	ne	ns	+	+	+	ns	+	ne	ne	Prats-Puig et al. 2013 [10]
17	T2D	Downregulated	ns	ne	ne	+	ns	ns	ns	ns	ns	ne	ne	ne	ne	ne	ne	Williams et al. 2019 [18]
18a	T2D	Downregulated	ns	ns	ns	ns	ns	ns	ns	ns	ns	ns	ne	ne	ne	ne	ne	Candia et al. 2017 [37]
18b	T2D	Downregulated	ns	ns	ns	ns	ns	-	-	ns	ns	ns	ne	ne	ne	ne	ne	Candia et al. 2017 [37]
20a	Obesity	Upregulated	ns	ne	ne	ne	ne	ne	ne	ne	+	ne	ne	ne	ne	ne	ne	Cui et al. 2018 [12]
21	T2D, hypertension and dyslipidemia	Upregulated / Downregulated	ns	-	-	ns	+	- / +	+	+	-	-	-	+	ne	ne	+	Mahdavi et al. 2018 [16]; Ghorbani et al. 2017 [39]; Hijmans et al. 2018 [30]; Simionescu et al. 2014 [34]
23a	T2D	Downregulated	ns	ns	ns	ns	ns	ns	ns	ns	ns	ns	ne	ne	ne	ne	ne	Candia et al. 2017 [37]
24	T2D	Downregulated	ns	ns	ns	ns	ns	ns	ns	ns	ns	ns	ne	ne	ne	ne	ne	Candia et al. 2017 [37]
25	T2D and Obesity	Downregulated	ns	ns	ns	ns	ns	ne	ns	ns	ns	-	+	ns	ns	ns	ns	Lopez, Garufi, Seyhan 2016 [36]
26b	Obesity	Upregulated	ns	ne	ne	ne	ne	ne	ne	ne	+	ne	ne	ne	ne	ne	ne	Cui et al. 2018 [12]
27a	T2D	Downregulated	-	ns	ns	-	-	ns	ns	ns	-	-	ne	ne	ne	ne	ne	Candia et al. 2017 [37]
28	T2D and obesity	Downregulated	ns	ns	-	ns	ns	-	-	ns	-	-	-	-	+	ne	ne	Candia et al. 2017 [37]; Prats-Puig et al. 2013 [10]
29a	T2D	Downregulated	ns	ne	ns	ns	ns	ns	ns	ns	ns	ne	ne	ne	ne	ne	ne	Sucharita et al. 2018 [17]
29b	T2D and Obesity	Downregulated	ns	ns	ns	ns	ns	ne	ns	ns	ns	ns	ns	ns	ns	ns	ns	Lopez, Garufi, Seyhan 2016 [36]
30d	T2D	Upregulated / Downregulated	ns	-	- / +	-	-	ns	ns	+	ns	-	ne	ne	ne	ne	ne	Candia et al. 2017 [37]; Sucharita et al.2018 [17]
33a	T2D and dyslipidemia	Upregulated	ns	ns	ns	ne	+	+/ -	+	ns	ns	-	ns	+	ne	ne	+	Corona-Meraz et al. 2019 [35]; Simionescu et al. 2014 [34]
33b	T2D	Upregulated	ns	ns	ns	ne	-	-	ns	ns	ns	ns	ns	ns	ne	ne	ne	Corona-Meraz et al. 2019 [35]
34a	Hypertension and obesity	Upregulated	ns	ns	ne	ne	ns	ns	ns	ns	+	ns	+	ne	ne	ne	ne	Hijmans et al 2018 [21]; Hijmans et al. 2018 [30]
92a	HAS	ns	ns	ns	ne	ne	ns	ns	ns	ns	ns	ns	ns	ne	ne	ne	ne	Hijmans et al 2018 [21]; Hijmans et al. 2018 [30]
93	T2D and Obesity	Downregulated	ns	ns	ns	ns	ns	ne	ns	ns	ns	-	+	ns	ns	ns	ns	Lopez, Garufi, Seyhan 2016 [36]
99a	T2D	Upregulated	ns	ns	ns	ns	ns	ns	ns	ns	ns	ns	ne	ne	ne	ne	ne	Candia et al. 2017 [37]
99b	T2D	Upregulated	ns	ns	ns	ns	ns	ns	ns	ns	ns	ns	ns	ne	ne	ne	ne	Prabu et al. 2015 [38]
101	T2D	Upregulated	+	ns	ne	+	ns	ns	ns	ns	+	ne	ns	ne	ne	ne	ne	Higuchi et al., 2015 [32]
122	Obesity and T2D	Upregulated	+	+	+	ne	+	ne	ne	-	+	ns	+	ns	-	ne	ne	Candia et al. 2017 [37]; Prats-Puig et al. 2013 [10]; Wang et al. 2015 [9]
125a	Dyslipidemia	Upregulated	ns	ne	ne	ne	+	+	+	ns	ne	ne	ne	+	ne	ne	+	Simionescu et al. 2014 [34]
125b	T2D and obesity	Downregulated	-	ne	ns	-	-	ns	ns	ns	ns	ns	ns	-	ns	ne	ne	Ortega et al. 2014 [25]; Prats-Puig et al. 2013 [10]
126	Hypertension, obesity, T2D and metabolic syndrome	Downregulated	-	ns	ns	-	+	ns	ns	ns	- / +	+	-	ne	ne	ne	ne	Hijmans et al 2018 [21]; Hijmans et al. 2018 [30]; Krause et al. 2015 [19]; Ortega et al. 2014 [25]
128	T2D	Upregulated	ns	ns	ns	ns	ns	+	ns	ns	ns	ns	ns	ne	ne	ne	ne	Prabu et al. 2015 [38]
130b	T2D and obesity	Upregulated / Downregulated	+ / -	+	+	+ / -	+ / -	ns	+	+ / -	+	+	ns	+	+	+	ne	Al-Rawaf, 2018 [13]; Ortega et al. 2014 [25]; Prats-Puig et al. 2013 [10]; Prabu et al. 2015 [38]
133a	T2D	Downregulated	ns	ne	ns	ns	ns	ns	ns	ns	ns	ne	ne	ne	ne	ne	ne	Sucharita et al., 2018 [17]
132	Metabolic syndrome	ns	ns	ns	ns	ne	ns	ne	ne	ns	ns	ns	ns	ne	ne	ne	ne	Krause et al. 2015 [19]
140	T2D and obesity	Upregulated	+	+	+	+	+	ns	+	+	+	+	+	ns	+	+	ne	Al-Rawaf, 2018 [13]; Ortega et al. 2014 [25]; Prats-Puig et al. 2013 [10]
142	T2D and obesity	Upregulated / Downregulated	+	+	+	+	+	ns	+	+	+	+	+	+	+	+	ne	Al-Rawaf, 2018 [13]; Ortega et al. 2014 [25]; Prabu et al. 2015 [38]; Prats-Puig et al. 2013 [10]
143	Obesity and T2D	Upregulated / Downregulated	+	+	+	ns	+	ns	+	+	+	ns	ne	ne	+	+	ne	Al-Rawaf, 2018 [13]; Sucharita et al. 2018 [17]; Candia et al. 2017 [37]
145	Hypertension and metabolic syndrome	ns	ns	ns	ns	ne	ns	ns	ns	ns	ns	ns	ns	ne	ne	ne	ne	Hijmans et al. 2018 [21]; Hijmans et al. 2018 [30]; Krause et al. 2015 [19]
146a	Obesity, hypertension, T2D and dyslipidemia	Upregulated / Downregulated	-	-	-	ne	+	+	+	+	+/-	ns	-	+	+	+	+	Al-Rawaf, 2018 [13]; Cui et al. 2018 [12]; Hijmans et al. 2018 [21]; Hijmans et al 2018 [30]; Rong et al., 2013 [33]; Simionescu et al. 2014 [34]
146b	Obesity	Upregulated	+	ne	ne	ne	ne	ne	ne	ne	+	ne	ne	ne	ne	ne	ne	Cui et al. 2018 [12]
148a	T2D	Upregulated	ns	ns	ns	+	ns	ns	ns	ns	ns	ns	ne	ne	ne	ne	ne	Candia et al. 2017 [37]
150	Obesity	Downregulated	ns	ns	ne	ne	ns	ns	ns	ns	-	ns	ns	ne	ne	ne	ne	Hijmans et al. 2018 [21]
152	T2D and obesity	Upregulated	ns	ns	ns	ns	ns	ne	ns	ns	ns	ns	ns	ns	ns	ns	ns	Lopez, Garufi, Seyhan 2016 [36]
155	T2D	Downregulated	ns	-	-	ns	ns	-	ns	ns	-	-	ns	ne	ne	ne	ne	Mahdavi et al., 2018 [16]; Ghorbani et al., 2017 [39]
181b	Hypertension	ns	ns	ns	ne	ne	ns	ns	ns	ns	ns	ns	ns	ne	ne	ne	ne	Hijmans et al. 2018 [21]; Hijmans et al. 2018 [30]
191	Obesity	Downregulated	ns	+	+	ns	ns	ns	ns	ns	ns	ne	ne	ne	ne	ne	ne	Iacomino et al. 2019 [14]
192	T2D and obesity	Downregulated	-	ne	ne	-	-	ns	ns	ns	ns	ne	ns	ne	ne	ne	ne	Ortega et al. 2014 [25]
195	T2D and obesity	Downregulated	-	ne	+	ns	ns	ne	ne	ns	+	+	+	ns	-	ne	ne	Ortega et al. 2014 [25]; Prats-Puig et al. 2013 [10]
197	Obesity	Downregulated	ns	ne	ne	ne	ne	ne	ne	ne	-	ne	ne	ne	ne	ne	ne	Cui et al. 2018 [12]
215	Obesity	Downregulated	ns	ns	ns	ns	ns	ns	ns	ns	-	ne	ne	ne	ne	ne	ne	Iacomino et al. 2019 [14]
221	Obesity, dyslipidemia and metabolic syndrome	Upregulated / Downregulated	+	ne	+	ne	ns	+	+	+	-	-	-	-	+	ne	ne	Prats-Puig et al. 2013 [10]; Wang et al. 2013 [9]; Zhou et al. 2018 [29]
222	T2D, dyslipidemia and obesity	Upregulated	+	+	+	+ /-	+	ns	+	+ / -	+	+	ns	+	+	+	ne	Al-Rawaf, 2018 [13]; Cui et al. 2018 [12]; Ortega et al. 2014 [25]; Prats-Puig et al. 2013 [10]; Candia et al. 2017 [37]; Zhou et al. 2018 [29]
223	T2D and obesity	Upregulated	ns	ns	ns	ns	ns	ne	ns	ns	ns	+	ns	ns	ns	ns	ns	Lopez, Garufi, Seyhan 2016 [36]
320b / 320c	T2D	Upregulated	ns	ns	ns	ns	ns	ns	ns	ns	ns	ns	ne	ne	ne	ne	ne	Candia et al. 2017 [37]
326	T2D and obesity	Upregulated	ns	ns	ns	ns	ns	ne	ns	ns	ns	ns	ns	ns	ns	ns	ns	Lopez, Garufi, Seyhan 2016 [36]
328	Obesity	Downregulated	ne	ne	ns	ne	ns	ne	ne	ns	-	-	ns	-	+	ne	ne	Prats-Puig et al. 2013 [10]
335	T2D	ns	-	ns	ns	-	ns	ns	ns	ns	ns	ns	ns	ne	ne	ne	ne	Higuchi et al., 2015 [32]
342	T2D	Downregulated	ns	ns	ns	ns	ns	ns	ns	ns	ns	ns	ne	ne	ne	ne	ne	Candia et al. 2017 [37]
363	Obesity	Upregulated	ne	ne	ns	ne	ns	ne	ne	ns	ns	ns	ns	+	-	ne	ne	Prats-Puig et al. 2013 [10]
374a	T2D	Upregulated	ns	+	+	+	ns	ns	ns	ns	ns	ns	ns	ne	ne	ne	ne	Prabu et al. 2015 [38]
375	T2D	Upregulated	ns	ns	ns	ns	+	ns	ns	ns	ns	ns	ns	ne	ne	ne	ne	Higuchi et al. 2015 [32]
423	T2D and obesity	Upregulated / Downregulated	-	-	+ / -	-	+ / -	ne	+	+ / -	+ / -	+	ns	ns	+	+	ne	Al-Rawaf, 2018 [13]; Ortega et al. 2014 [25]; Prabu et al. 2015 [38]; Prats-Puig et al. 2013 [10]
484	T2D	Downregulated	ns	ns	ns	ns	ns	ns	ns	ns	ns	ns	ns	ne	ne	ne	ne	Prabu et al. 2015 [38]
486	Obesity and metabolic syndrome	Upregulated	+	ne	+	ne	+	ne	ne	-	+	+	+	+	-	ne	ne	Cui et al. 2018 [12]; Prats-Puig et al. 2013 [10]; Zaki et al. 2019 [20]
497	Metabolic syndrome	Upregulated	+	ne	ne	ne	+	ne	ne	ns	ns	+	ns	ne	ne	ne	ne	Zaki et al. 2019 [20]
501	Obesity	Upregulated	ns	ns	ns	ns	ns	ns	ns	ns	+	ne	ne	ne	ne	ne	ne	Iacomino et al. 2019 [14]
509	Metabolic syndrome	Upregulated	+	ne	ne	ne	+	ne	ne	ns	ns	+	ns	ne	ne	ne	ne	Zaki et al. 2019 [20]
520c	Obesity	Downregulated	-	-	-	ne	+	ne	+	+	-	ne	ne	ne	+	+	ne	Al-Rawaf, 2018 [13]
532	Obesity and T2D	Upregulated / Downregulated	-	-	+ / -	-	+ / -	ne	+	+	+ / -	+	+	+	+	+	ne	Al-Rawaf, 2018 [13]; Ortega et al. 2014 [25]; Prats-Puig et al. 2013 [10]
551a	Obesity	Upregulated	ns	ns	ns	ns	ns	ns	ns	ns	+	ne	ne	ne	ne	ne	ne	Iacomino et al. 2019 [14]
605	Hypertension and metabolic syndrome	Upregulated	+	ne	ne	ne	-	+	+	-	ns	-	+	ne	ne	ne	ne	Badawy, Abo-Elmatty, Mesbah 2018 [22]; Zaki et al. 2019 [20]
623	Hypertension	Upregulated	ne	ne	ne	ne	ns	ns	ns	-	ns	ne	ns	ne	ne	ne	ne	Badawy, Abo-Elmatty, Mesbah 2018 [22]
629	T2D	Upregulated	ns	ns	ns	ns	ns	ns	ns	ns	ns	ns	ns	ne	ne	ne	ne	Prabu et al. 2015 [38]
802	T2D	Upregulated	+	ns	ns	+	+	ns	ns	-	ns	ns	ns	ne	ne	ne	ne	Higuchi et al., 2015 [32]
874	Obesity	Downregulated	ns	ns	ns	ns	ns	ns	ns	ns	-	ns	ne	ne	ne	ne	ne	Iacomino et al. 2019 [14]
let-7d	T2D	Upregulated / Downregulated	ns	ns	ns	ns	ns	-	-	ns	ns	ns	ne	ne	ne	ne	ne	Candia et al. 2017 [37]; Prabu et al. 2015 [38]
let-7e	Metabolic syndrome	Upregulated	ns	ns	ns	ne	ns	ne	ne	-	ns	ns	ns	ne	ne	ne	ne	Krause et al. 2015 [19]
let-7g	Metabolic syndrome	Upregulated	ns	ne	ne	ne	ns	ns	ne	-	ns	ns	+	ne	ne	ne	ne	Wang et al. 2013 [9]
(+): represents positive association with the variable; (-): represents negative association with the variable; (+/-): represents both positive/negative association with the variable in the different references; ne: not evaluated ; ns: not significant association; T2D: type 2 diabetes.
